# Supplementary material for: Chemogenetic Activation of Astrocytes in the Basolateral Amygdala Contributes to Fear Memory Formation by Modulating the Amygdala–Prefrontal Cortex Communication
Source: MDPI journal article supplement (doi:10.3390/ijms23116092), 2022-05-29
Supplement: s1 [file s1]

## SUPPLEMENTARY MATERIALS

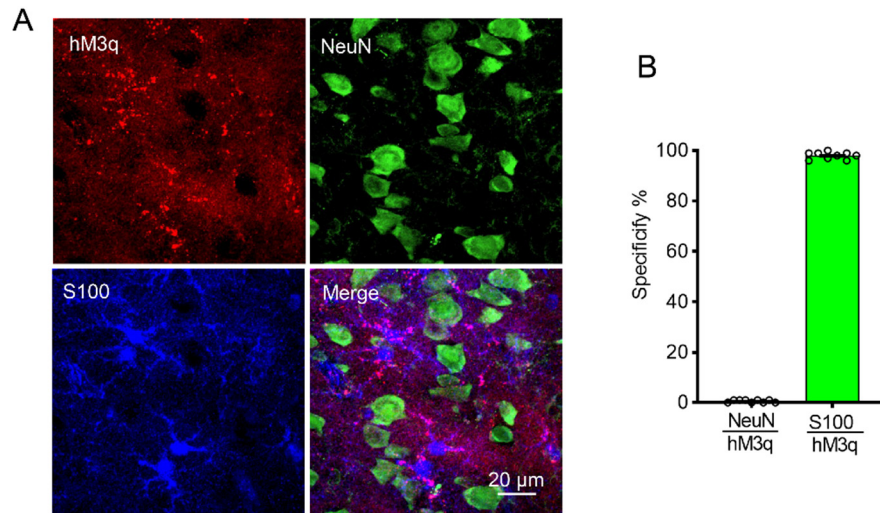

**Figure S1. hM3q expression has high specificity. Related to Figure 1.**

(A) hM3q (red) is co-expressed with S100 (blue) but not NeuN (green), scale bar 20  $\mu$ m.

(B) Quantification of the percentage of co-expression level of NeuN/hM3q and S100/hM3q.

(n = 3 of each group, 9 slices per group, data are presented as mean  $\pm$  SEM.)

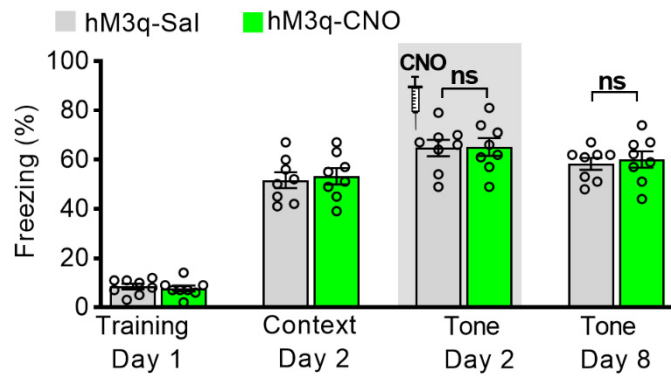

**Figure S2. Astrocytic Gq activation in BLA does not have a direct effect on memory recall. Related to Figure 1.**

Chemogenetic activation of astrocyte Gq in BLA during day auditory cued test on day 2 did not affect the cue fear memory on day 2 ( $p > 0.999$ ) and day 8 ( $p > 0.999$ ) (Saline group  $n = 8$ , CNO group  $n = 8$ , ns stands for no significance, two-way ANOVA followed by Bonferroni's post hoc test, main effect of Sal/CNO:  $F(1, 14) = 0.1453$ ,  $P = 0.7088$ ). Data are presented as mean  $\pm$  SEM.

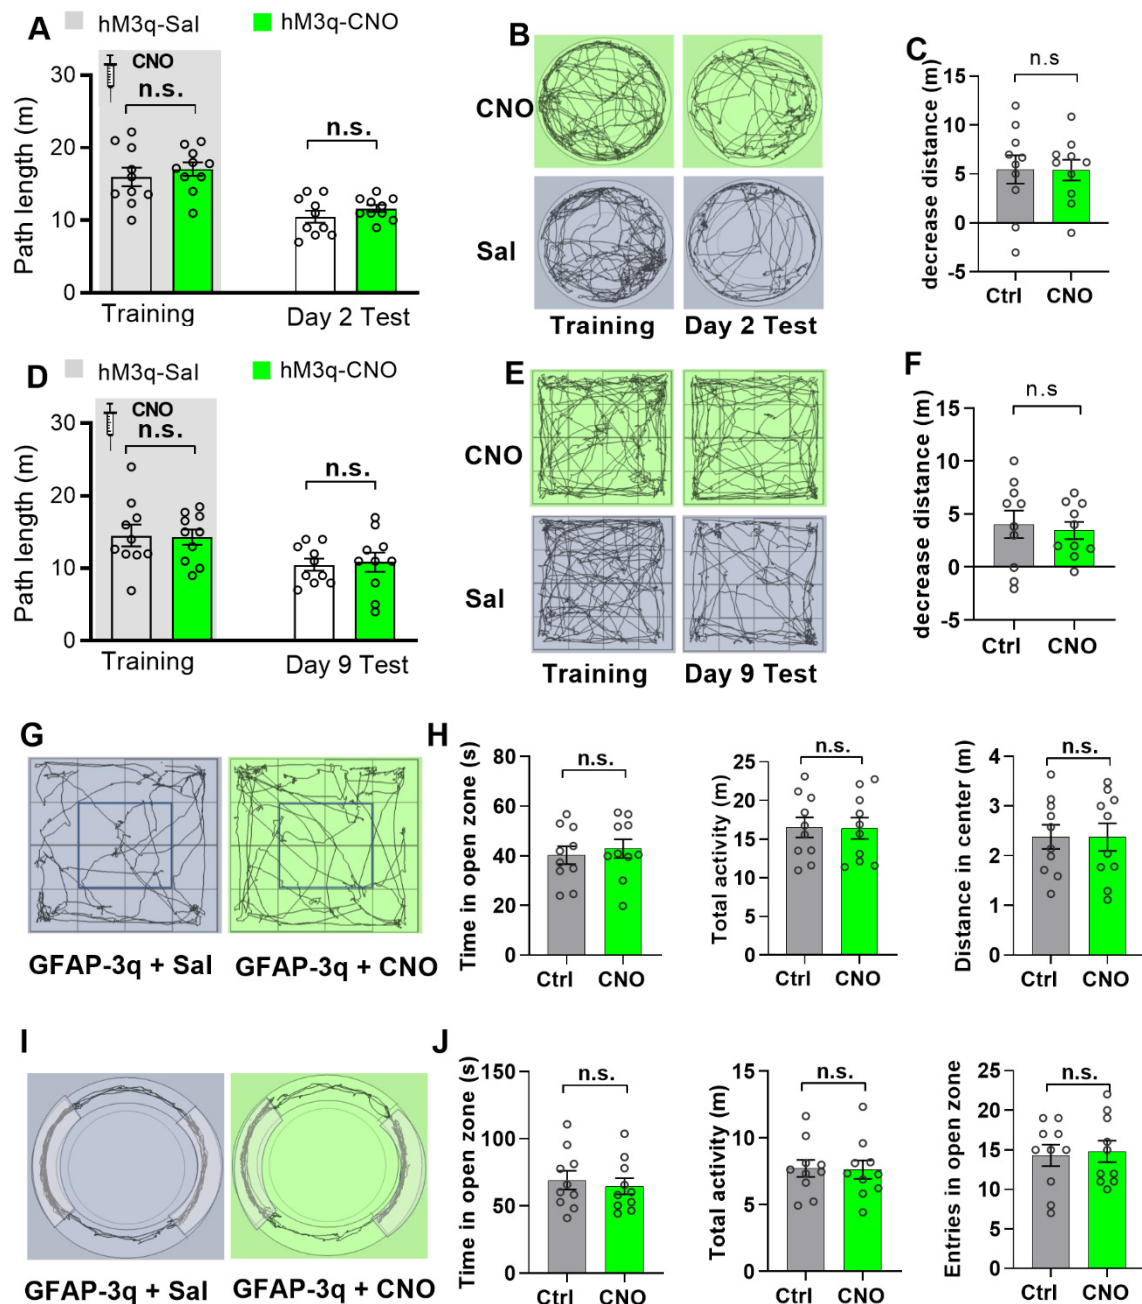

**Figure S3. Astrocytic Gq activation in BLA did not affect non-aversive memory and did not induce anxiety-like behavior. Related to Figure 1.**

(A–F) Astrocytic Gq activation did not affect the short-term (day 2 test) or long-term (day 9 test) association memory in the less-stress memory task.

(G,H) Chemogenetic astrocytic Gq activation did not affect the time in open zone (center zone), the total activity, or distance in center of OFT.

**(I,J)** Chemogenetic astrocytic Gq activation did not affect the time in open zone, the total activity, or entries in open zone in EZM (unpaired student t test, n = 10 in each group, data are presented as mean  $\pm$  SEM).
